# Supplementary material for: Facile electrochemical co-deposition of a graphene–cobalt nanocomposite for highly efficient water oxidation in alkaline media: direct detection of underlying electron transfer reactions under catalytic turnover conditions
Source: Royal Society of Chemistry journal article supplement (doi:10.1039/c4cp01608d), 2014-01-01
Supplement: c4cp01608d1.pdf [file c4cp01608d1.pdf]

## Supporting Information

### **Facile Electrochemical Co-Deposition of a Graphene/Cobalt Nanocomposite for Highly Efficient Water Oxidation in Alkaline Media: Direct Detection of Underlying Electron Transfer Reactions Under Catalytic Turnover Conditions**

Si-Xuan Guo,<sup>a</sup> Yuping Liu,<sup>a</sup> Alan M. Bond\*<sup>a</sup> and Jie Zhang\*<sup>a</sup>  
Esakki Karthik,<sup>b</sup> Ilango Maheswaran,<sup>b</sup> Senthil Kumar<sup>b</sup> and Kanala L.N. Phani\*<sup>b</sup>

<sup>a</sup> School of Chemistry, Monash University, Clayton, Vic 3800, Australia  
E-mails: [alan.bond@monash.edu](mailto:alan.bond@monash.edu), [jie.zhang@monash.edu](mailto:jie.zhang@monash.edu)

<sup>b</sup> Nanoscale Electrocatalysis & Sensor Research Group, Electrodes and Electrocatalysis Division, CSIR-Central Electrochemical Research Institute, Karaikudi, Tamilnadu, India  
E-mail: [klnphani@cecri.res.in](mailto:klnphani@cecri.res.in)

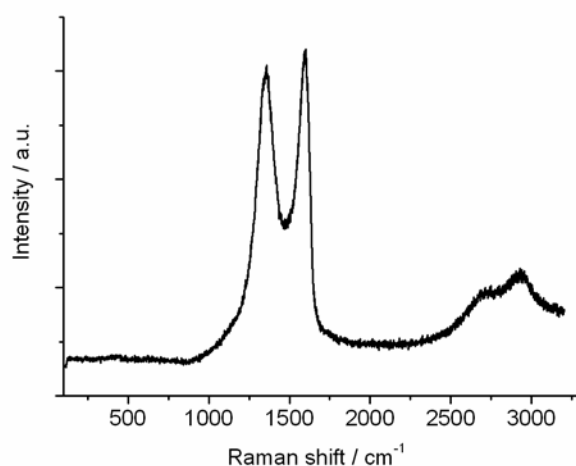

**Fig. S1** Raman spectrum derived from thick graphene layers present on a graphene/cobalt nanocomposite modified FTO electrode after deposition at -1.4 V for 1000 s.

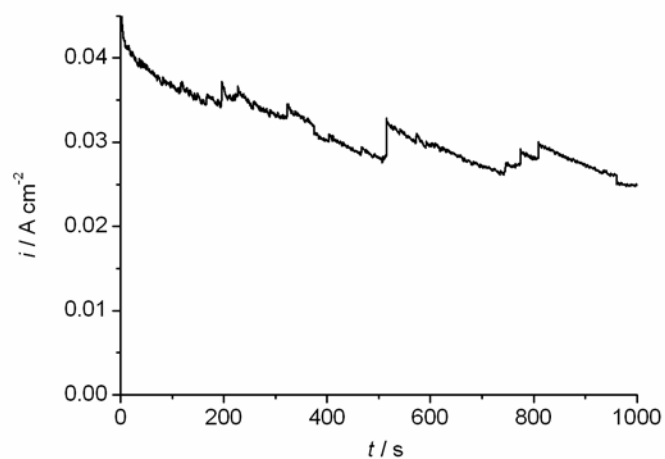

**Fig. S2** Plot of catalytic current versus time during controlled potential electrolysis of a cobalt modified electrode in 1 M NaOH. Applied potential: + 0.8 V vs. Ag/AgCl. Cobalt deposition at -1.4 V for 1000 s in an aqueous solution containing 0.8 mM  $\text{Co}(\text{NO}_3)_2$  and 0.1 M  $\text{NaNO}_3$ .

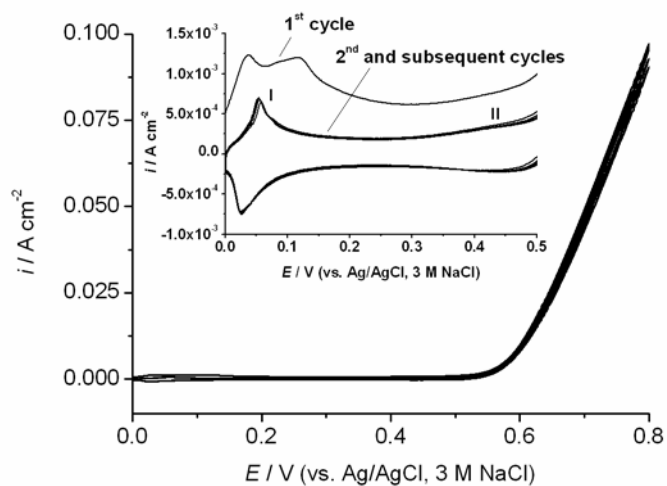

**Fig. S3** Electrocatalytic water oxidation in aqueous 1 M NaOH electrolyte at a scan rate of  $50 \text{ mV s}^{-1}$  using a cobalt modified electrode, under conditions described in the main text. Inset shows the cobalt processes in the potential range of 0 – +0.5 V. Deposition of cobalt at -1.4 V for 1000 s in an aqueous 0.05 M phytic acid solution (pH 7) containing 0.8 mM  $\text{Co}(\text{NO}_3)_2$ .

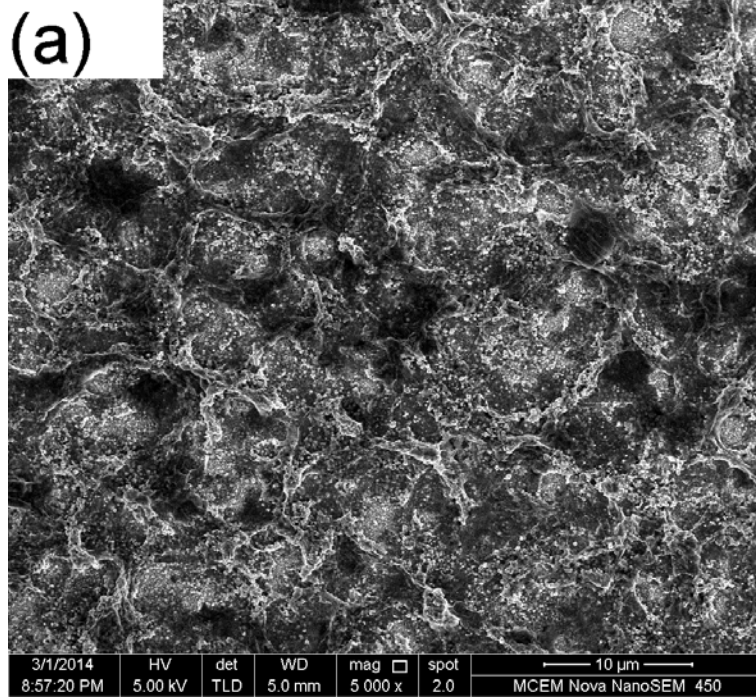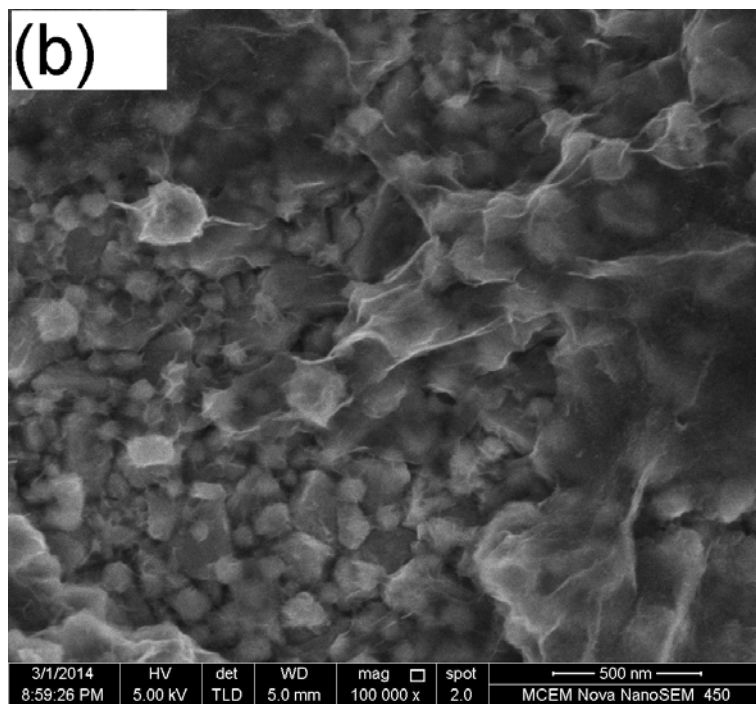

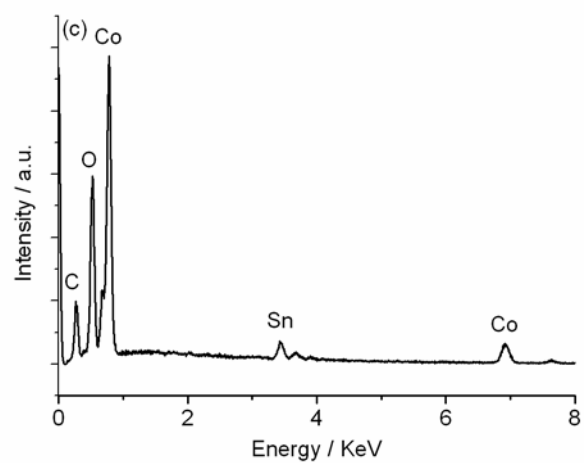

**Fig. S4** SEM images (a, b) and EDX spectrum (c) obtained at a cobalt – graphene modified FTO electrode. Cobalt – graphene deposition at -1.4 V for 1000 s in an aqueous 0.05 M phosphate buffer solution (pH 7) containing  $1 \text{ mg ml}^{-1}$  graphene oxide and 0.8 mM  $\text{Co}(\text{NO}_3)_2$ .

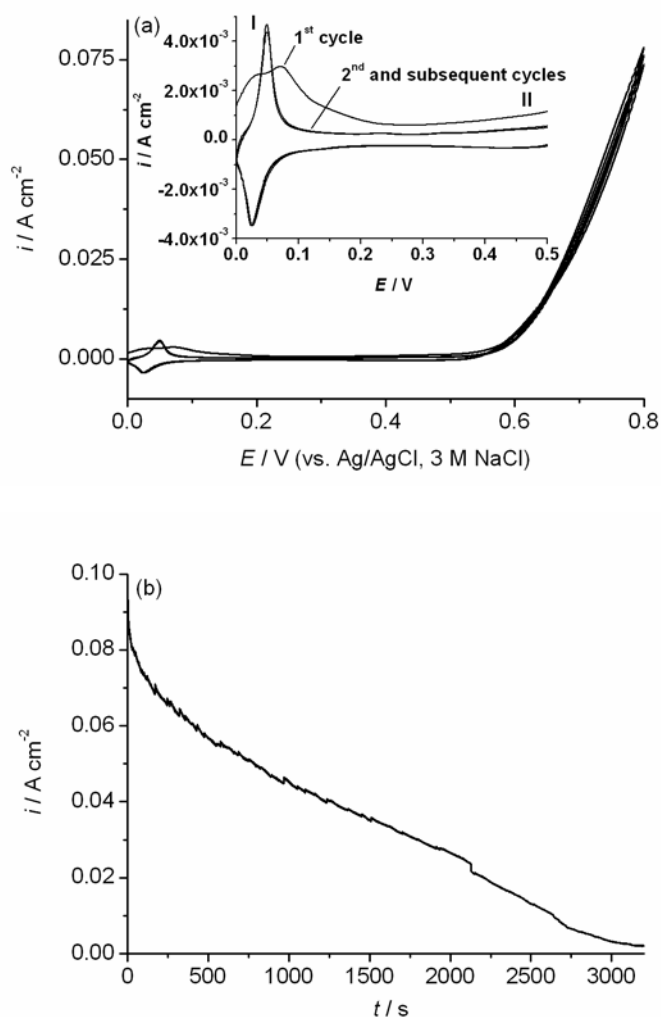

**Fig. S5** (a) Cyclic voltammogram of electrocatalytic water oxidation by a cobalt – graphene modified GC electrode in aqueous 1 M NaOH electrolyte at a scan rate of  $50 \text{ mV s}^{-1}$ . Inset shows the cobalt processes in the potential range of 0 – +0.5 V. (b) Plot of catalytic current versus time during controlled potential electrolysis at the cobalt – graphene modified GC electrode in 1 M NaOH at a potential of +0.8 V. Cobalt – graphene deposition at -1.4 V for 1000 s in an aqueous 0.05 M phosphate buffer solution (pH 7) containing  $1 \text{ mg ml}^{-1}$  graphene oxide and  $0.8 \text{ mM Co(NO}_3)_2$ .

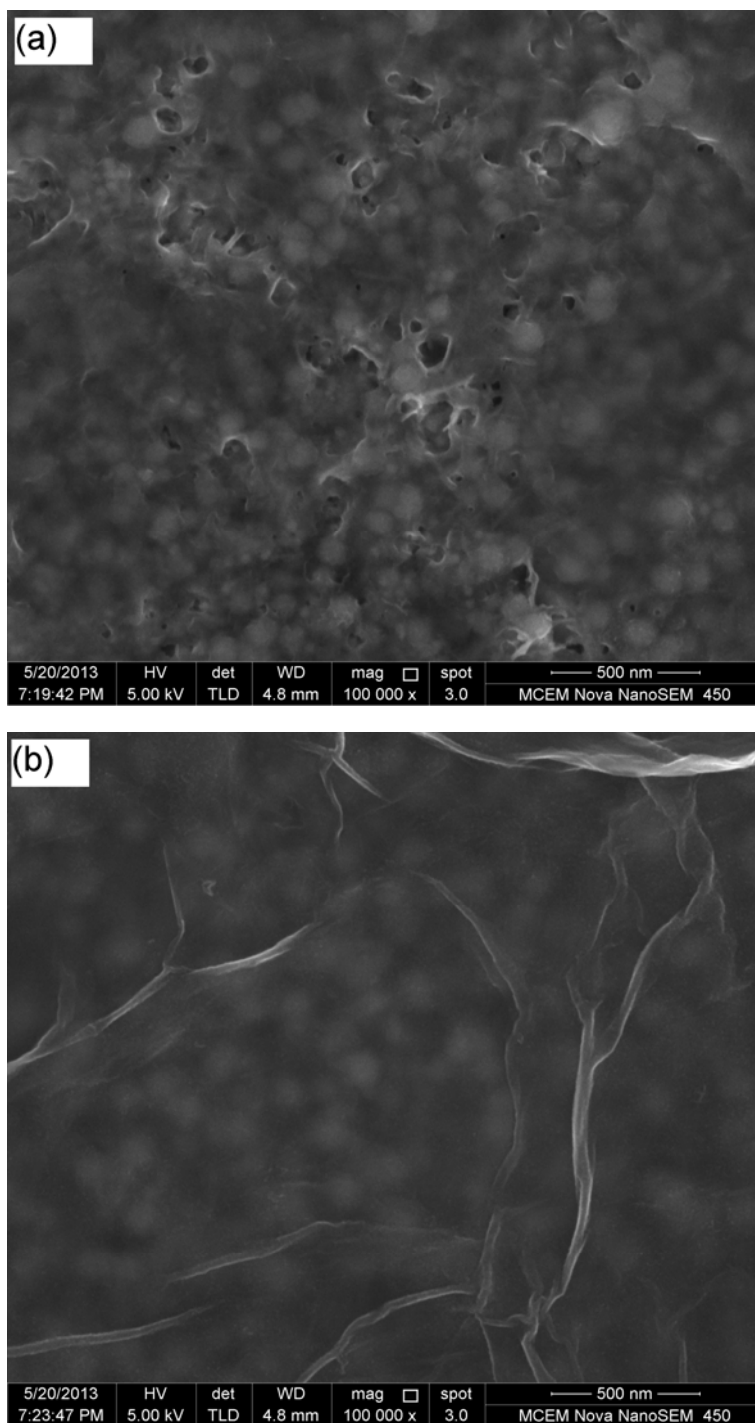

**Fig. S6** SEM images of thin graphene layers showing holes (a) and intact thick layers (b) derived from a graphene/cobalt nanocomposite modified FTO electrode after controlled potential electrolysis at +0.8 V vs. Ag/AgCl for 1000 s in 1 M NaOH. Deposition of nanocomposite at -1.4 V for 1000 s.

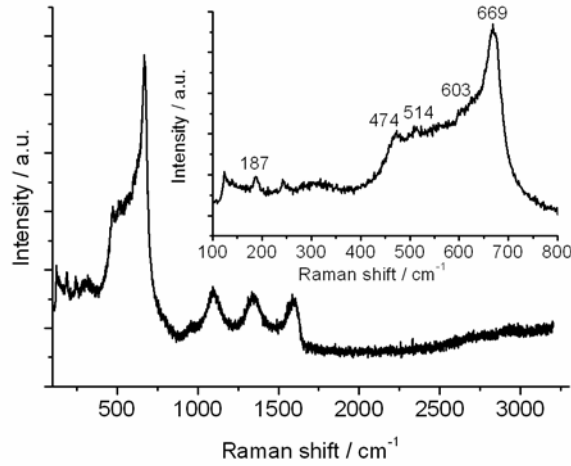

**Fig. S7** Raman spectra obtained from a graphene/cobalt nanocomposite modified FTO electrode after controlled potential electrolysis in 1 M NaOH at +0.8 V for 1000s. Deposition of nanocomposite at -1.4 V for 1000 s.

### Estimation of the change of OH<sup>-</sup> concentration during water electrolysis under stationary conditions.

Assuming the faradaic efficiency of electrolysis is 100%, the amount of OH<sup>-</sup> consumed ( $N$ ) during electrolysis ( $4 \text{ OH}^- \rightarrow \text{O}_2 + 2 \text{ H}_2\text{O} + 4 \text{ e}^-$ ) can be calculated from Faraday's law,

$$Q = \int_0^t I dt = nNF \quad (1)$$

where  $n$  is the number of electron transferred per OH<sup>-</sup> which is one,  $I$  is the time dependent electrolysis current,  $t$  is the electrolysis time and  $F$  is Faraday's constant. In our case,  $I$  is almost constant during electrolysis (Fig. 7), therefore eq 1 can be simplified to,

$$N = \frac{It}{F} \quad (2)$$

To calculate how the consumption of OH<sup>-</sup> affects the OH<sup>-</sup> concentration in the solution adjacent to the electrode surface under stationary condition, the volume of the solution ( $V$ ), where the concentration of OH<sup>-</sup> is affected, is estimated based on the diffusion layer thickness ( $L = \sqrt{\pi Dt}$ ) and electrode area ( $A$ ),

$$V = LA = A\sqrt{\pi Dt} \quad (3)$$

where  $D$  is the diffusion coefficient of OH<sup>-</sup>.

The change of the average molar concentration of OH<sup>-</sup> ( $\Delta[\text{OH}^-]$ ) in the diffusion layer can then be estimated using equation 4 which is derived from eqs 2 and 3,



$$\Delta[\text{OH}^-] = \frac{1000N}{V} = \frac{1000It}{FA\sqrt{\pi Dt}} = \frac{1000i\sqrt{t}}{F\sqrt{\pi D}} \quad (4)$$

where  $i = I/A$  is the current density.

Based on eq 4, the amount of  $\text{OH}^-$  consumed chronoamperometrically in 10 s is estimated to decrease the average  $\text{OH}^-$  concentration in the diffusion layer by  $\sim 0.36$  M, using a current density of  $0.14 \text{ A cm}^{-2}$  (Fig. 4) and a diffusion coefficient of  $5.3 \times 10^{-5} \text{ cm}^2 \text{ s}^{-1}$  for the  $\text{OH}^-$  ion (E. Samson, J. Marchand and K. A. Snyder, *Mater. Struct.*, 2003, **36**, 156-165.).
